# Supplementary material for: Transverse Growth and Torque Compensation of First Molar in Adolescents Using 3D Digital Dental Analysis
Source: Research Square preprint supplement (doi:10.21203/rs.3.rs-8518955/v1), 2026-01-30
Supplement: Supplementary file 1 [file 4424aed43f59599fc202a6bc.docx]

**Supplementary Table S1. Maxillary and mandibular basal bone widths at different ages (Mean ± SD, mm)**

| Age (years） | JL-JR (Mean ± SD, mm） | | Age (years） | AG-GA (Mean ± SD（mm） | |
| --- | --- | --- | --- | --- | --- |
| Male | Female | Male | Female |
| 8 | 64.38 ± 3.91 | 63.55 ± 2.38 | 8 | 79.69 ± 4.06 | 79.81 ± 1.29 |
| 9 | 66.37 ± 2.79 | 64.50 ± 3.46 | 9 | 81.65 ± 4.06 | 80.93 ± 4.52 |
| 10 | 67.01 ± 3.06 | 64.52 ± 3.33 | 10 | 82.32 ± 2.96 | 80.99 ± 4.36 |
| 11 | 68.48 ± 3.28 | 65.92 ± 3.54 | 11 | 84.15 ± 2.63 | 82.85 ± 4.31 |
| 12 | 70.04 ± 2.92 | 66.51 ± 3.37 | 12 | 86.28 ± 3.12 | 83.66 ± 4.32 |
| 13 | 70.87 ± 6.82 | 67.13 ± 2.78 | 13 | 87.39 ± 3.41 | 84.55 ± 4.07 |
| 14 | 71.28 ± 2.78 | 67.35 ± 3.10 | 14 | 88.64 ± 3.01 | 84.91 ± 3.89 |
| 15 | 71.12 ± 3.79 | 67.57 ± 2.46 | 15 | 89.75 ± 3.32 | 85.97 ± 3.93 |
| 16 | 71.18 ± 2.36 | 67.25 ± 3.50 | 16 | 90.64 ± 3.33 | 85.77 ± 3.53 |
| 17 | 71.10 ± 2.20 | 67.24 ± 3.02 | 17 | 90.78 ± 4.15 | 85.91 ± 3.51 |
| 18 | 71.00 ± 2.50 | 67.23 ± 2.96 | 18 | 90.97 ± 3.62 | 86.28 ± 3.46 |

Note: SD = standard deviation; JL–JR indicates maxillary basal bone width; AG–GA indicates mandibular basal bone width.
