# Supplementary material for: Transverse Growth and Torque Compensation of First Molar in Adolescents Using 3D Digital Dental Analysis
Source: Research Square preprint supplement (doi:10.21203/rs.3.rs-8518955/v1), 2026-01-30
Supplement: Supplementary file 2 [file b407b0a4b5ca16ad0503dbfc.docx]

**Supplementary Table S2. Bonferroni-adjusted pairwise comparisons between age groups**

| Measurements(°) | Age pairs with statistically significant differences after Bonferroni correction (years) |
| --- | --- |
| U6torque  L6torque | 10-18*  8-12*，8-13***，8-14***，8-15***，8-16***，8-17***， 8-18***，9-14**，9-15***，9-16***，9-17***，9-18***， 10-15**，10-16***，10-17**，10-18*，11-16*，12-16* |

Note:*p＜0.05; **p＜0.01; ***p＜0.001
